# Supplementary material for: Bypass Mechanisms of the Androgen Receptor Pathway in Therapy-Resistant Prostate Cancer Cell Models
Source: PLoS One. 2010 Oct 19;5(10):e13500. doi: 10.1371/journal.pone.0013500 (PMC2957443; doi:10.1371/journal.pone.0013500)
Supplement: Table S3 — Genes differentially expressed in PC346Flu2 vs. PC346C, expression ratios and SAM q-values. (0.05 MB XLS) [file pone.0013500.s003.xls]

## Sheet: Table S3
Table S3 - Genes differentially expressed in PC346Flu2 vs PC346C expression ratios and SAM q-values
GenBank ID	Cytoband	Symbol	HUGO Gene Name	PC346DCC		PC346Flu1		PC346Flu2
				2log ratio	qvalue	2log ratio	qvalue	2log ratio	qvalue
NM_014380	Xq22.2	NGFRAP1	nerve growth factor receptor TNFRSF16 associated protein 1	-0.2	0.513	-2.5	0	-2.7	0
AF216077	9q32	COL27A1	collagen type XXVII alpha 1	-2.1	0	-2.8	0	-1.7	0.053
NM_001359	8q21.3	DECR1	2 4-dienoyl CoA reductase 1 mitochondrial	-1.9	0	-1.1	0	-1.6	0.053
NM_001758				-1	0	-0.9	0.048	-1.4	0
NM_005510	6p21.3	DOM3Z	dom-3 homolog Z C. elegans	0.5	0.211	0.1	0.422	-1.4	0.053
NM_002151	19q11-q13.2	HPN	hepsin transmembrane protease serine 1	-1	0	-0.9	0	-1.4	0.053
X04236	6p12.1	RN7SK	RNA, 7SK small nuclear	-0.2	0.513	-0.6	0.054	-1.4	0.115
AB020968	6q22.2	MARCKS	myristoylated alanine-rich protein kinase C substrate	-1.6	0	-2	0	-1.3	0.053
NM_003278	3p22-p21.3	CLEC3B	C-type lectin domain family 3 member B	-1.5	0.005	-1.3	0	-1.3	0.084
AL122055	6q21	CDC2L6	cell division cycle 2-like 6 CDK8-like	-1.4	0	-1.3	0	-1.2	0
NM_016306	3q27.3	DNAJB11	DnaJ Hsp40 homolog subfamily B member 11	-0.4	0.046	-0.2	0.287	-1.1	0.089
AK000933	1q42-q44	KMO	kynurenine 3-monooxygenase kynurenine 3-hydroxylase	-0.4	0.179	0	0.527	-1	0.064
NM_015544	17q11.2	TMEM98	transmembrane protein 98	-0.1	0.534	-0.3	0.211	-1	0.053
NM_007173	11q14.1	PRSS23	protease serine 23	-1.2	0.018	-0.9	0.021	-0.9	0.101
D70833	19p12	ZNF208	zinc finger protein 208	0	0.645	-0.7	0.044	-0.9	0.089
D80010	2p25.1	LPIN1	lipin 1	-1.2	0	-1.1	0.015	-0.9	0.053
NM_006829	10q23.2	C10orf116	chromosome 10 open reading frame 116	-1.1	0.009			-0.9	0.084
NM_005709	11p15.1-p14	USH1C	Usher syndrome 1C autosomal recessive severe	-0.5	0.136	-1.1	0	-0.9	0.053
NM_016598	3p21.31	ZDHHC3	zinc finger DHHC-type containing 3	-1.4	0.003	-1.1	0	-0.9	0.053
AL049963	4q22-q24	SLC39A8	solute carrier family 39 zinc transporter member 8	-1.5	0	-1.4	0	-0.9	0.053
AL049265	5q11	IL6ST	interleukin 6 signal transducer gp130 oncostatin M receptor	-0.6	0.07	-0.7	0.08	-0.9	0.053
NM_017935	4q24	BANK1	B-cell scaffold protein with ankyrin repeats 1	-2.9	0	-1.8	0	-0.8	0.053
NM_002245	1q42-q43	KCNK1	potassium channel subfamily K member 1	-0.2	0.534	-0.5	0.101	-0.8	0.053
AF188747	19q13.41	KLK2	kallikrein-related peptidase 2	-2.3	0	-0.7	0.063	-0.8	0.053
NM_002252	2p24	KCNS3	potassium voltage-gated channel delayed-rectifier subfamily S member 3	0.2	0.438	-0.6	0.08	-0.8	0.053
NM_003489	21q11.2	NRIP1	nuclear receptor interacting protein 1	-0.2	0.513	-0.6	0.063	-0.8	0.053
NM_017720	19p13.3	STAP2	signal transducing adaptor family member 2	-1	0	-1.1	0	-0.8	0.053
AF076617	Xp22.32	SLC25A6	solute carrier family 25 mitochondrial carrier adenine nucleotide translocator 6	0	0.638	-0.5	0.025	-0.8	0
X15667				-1.6	0.022	0.2	0.185	-0.8	0.053
NM_013309	15q11.2-21.3	SLC30A4	solute carrier family 30 zinc transporter member 4	-0.6	0.022	0.1	0.444	-0.8	0.053
NM_001417	12q13.13	EIF4B	eukaryotic translation initiation factor 4B	0	0.645	-0.1	0.473	-0.8	0.064
NM_001184	3q22-q24	ATR	ataxia telangiectasia and Rad3 related	-1	0.02	-0.6	0.048	-0.7	0.064
NM_014683	17p11.2	ULK2	unc-51-like kinase 2 C. elegans	0.8	0	0.3	0.09	-0.7	0.053
AK024018	19q13.32	GEMIN7	gem nuclear organelle associated protein 7	0.3	0.38	-0.3	0.16	-0.7	0
NM_004549	11q14.1	NDUFC2	NADH dehydrogenase ubiquinone 1 subcomplex unknown 2 14.5kDa	-0.7	0.022	0.2	0.287	-0.7	0
AK001843	2q33.1	FAM126B	family with sequence similarity 126 member B	-0.1	0.573	-0.6	0.101	-0.7	0.064
NM_012384	20q13.33	GMEB2	glucocorticoid modulatory element binding protein 2	0.2	0.34	0	0.517	-0.7	0.053
AY008271	4q22-q23	SMARCAD1	SWI/SNF-related matrix-associated actin-dependent regulator of chromatin subfamily a containing DEAD/H box 1	-0.3	0.113	-0.2	0.287	-0.7	0.084
NM_015415	1q24	BRP44	brain protein 44	-1	0.009	-0.5	0.09	-0.7	0.089
AB033034	12q23.3	GNPTAB	N-acetylglucosamine-1-phosphate transferase alpha and beta subunits	-0.5	0.037	-0.7	0.005	-0.7	0.064
D70835	19p12	ZNF675	zinc finger protein 675	0.1	0.493	-0.7	0.08	-0.7	0.194
L38937	17q21.2	FAM134C	family with sequence similarity 134 member C	-0.4	0.242	-0.3	0.211	-0.6	0.053
NM_001173	14q12	ARHGAP5	Rho GTPase activating protein 5	-0.2	0.513	-0.5	0.101	-0.6	0.053
AF100640				-0.4	0.242	-0.3	0.16	-0.6	0.089
M83822	4q31.23-31.3	LRBA	LPS-responsive vesicle trafficking beach and anchor containing	-1.1	0.003	-0.6	0.044	-0.6	0.101
NM_003541	6p22-p21.3	HIST1H4K	histone cluster 1 H4k	-0.5	0.293	0	0.533	-0.6	0.101
NM_014936	6p21.1	ENPP4	ectonucleotide pyrophosphatase/phosphodiesterase 4 putative function	-0.7	0.046	-0.4	0.16	-0.6	0.053
NM_005864	14q11.2-q12	EFS	embryonal Fyn-associated substrate	-1.4	0.009	0.4	0.135	-0.6	0.064
M32219	5q14.2	RPS23	ribosomal protein S23	-0.2	0.534	-0.3	0.115	-0.6	0.115
AL049998	11p15.5-p14	PIK3C2A	phosphoinositide-3-kinase class 2 alpha polypeptide	-0.4	0.157	-0.5	0.16	-0.6	0.328
NM_016171	2q35-q36	PTMA	prothymosin, alpha	0.1	0.573	0.1	0.444	-0.6	0.15
AK024800	20q13.2-13.3	NFATC2	nuclear factor of activated T-cells cytoplasmic calcineurin-dependent 2	-0.1	0.558	-0.4	0.101	-0.6	0.176
AF024698	19q13.43	ZNF583	zinc finger protein 583	-0.1	0.573	-0.4	0.09	-0.6	0.15
AJ276095	6p21.33-21.1	DEF6	differentially expressed in FDCP 6 homolog mouse	-0.6	0.014	-0.2	0.287	-0.6	0.053
AF085838				-0.1	0.589	0.1	0.444	-0.6	0.084
NM_002414	Xp22.32	CD99	CD99 molecule	0	0.624	-1	0.042	-0.6	0
NM_002165	20q11	ID1	inhibitor of DNA binding 1 dominant negative helix-loop-helix protein	-1.2	0.018			-0.6	0.5
NM_014781	8p22-q21.13	RB1CC1	RB1-inducible coiled-coil 1	-0.6	0.037	-0.6	0.115	-0.6	0.328
NM_001190	19q13	BCAT2	branched chain aminotransferase 2 mitochondrial	0.1	0.558	0	0.524	-0.5	0.053
NM_001873	4q32.3	CPE	carboxypeptidase E	-0.4	0.022	-0.7	0.044	-0.5	0.053
NM_017948	9q22.31	NOL8	nucleolar protein 8	-0.2	0.558	-0.3	0.16	-0.5	0.053
NM_006294	8q22	UQCRB	ubiquinol-cytochrome c reductase binding protein	-0.4	0.242	-0.1	0.517	-0.5	0.12
AF086462	10q22.3	C10orf58	chromosome 10 open reading frame 58	0.1	0.605	-0.3	0.287	-0.5	0.101
NM_005646	1q42.3	TARBP1	TAR HIV-1 RNA binding protein 1	-0.2	0.466	-0.1	0.473	-0.5	0.12
NM_001958	20q13.3	EEF1A2	eukaryotic translation elongation factor 1 alpha 2	-0.1	0.558	0.3	0.211	-0.5	0.134
NM_018123	1q31	ASPM	asp (abnormal spindle) homolog, microcephaly associated (Drosophila)	-0.4	0.1	0.1	0.422	-0.5	0.101
U52054	5q11.1	EMB	embigin homolog mouse	-0.9	0.022	-0.7	0.042	-0.5	0.15
NM_001197	22q13.31	BIK	BCL2-interacting killer apoptosis-inducing	-0.1	0.573	-0.5	0.115	-0.5	0.053
NM_004510	2q37.1	SP110	SP110 nuclear body protein	0.2	0.34	-0.2	0.185	-0.5	0.471
AF086535	1p34.3	C1orf102	chromosome 1 open reading frame 102	-0.2	0.009	0	0.422	0.5	0.218
NM_018255	18q12.2	ELP2	elongation protein 2 homolog S. cerevisiae	0.1	0.645	0	0.358	0.5	0.194
AF086001				0.5	0.07	0	0.524	0.5	0.089
NM_001494	10p15	GDI2	GDP dissociation inhibitor 2	0.1	0.412	-0.1	0.473	0.5	0.037
AK001829	18q23			0	0.605	-0.2	0.185	0.6	0.176
NM_004046	18q12-q21	ATP5A1	ATP synthase H transporting mitochondrial F1 complex alpha subunit 1	0.3	0.38	0	0.515	0.6	0.194
NM_004287	17q21	GOSR2	golgi SNAP receptor complex member 2	0.2	0.38	0.5	0.031	0.6	0.194
NM_015681	17p11.2	B9D1	B9 protein domain 1	0.2	0.293	0.3	0.16	0.6	0.194
NM_001660	3p21.2-p21.1	ARF4	ADP-ribosylation factor 4	0.1	0.573	-0.3	0.287	0.6	0.218
NM_016086	7q11.23	STYXL1	serine/threonine/tyrosine interacting-like 1	0.6	0.1	0.2	0.071	0.6	0.194
NM_001468	Xp11.23	GAGE1	G antigen 1	0.7	0.003	0.4	0.211	0.6	0
NM_019844	12p12	SLCO1B3	solute carrier organic anion transporter family member 1B3	-1.1	0.028	-0.2	0.394	0.6	0.194
AK026854	9p13.2	WDR32	WD repeat domain 32	0.3	0.086	0.1	0.211	0.6	0.194
NM_016215	9q34.3	EGFL7	EGF-like-domain multiple 7	0.6	0.242	-0.1	0.135	0.6	0.194
NM_014913	18q23	ADNP2	ADNP homeobox 2	0.1	0.293	0.1	0.287	0.6	0.218
AF151810	11q13	STARD10	StAR-related lipid transfer START domain containing 10	0.6	0.07	0.2	0.358	0.6	0.194
NM_002391	11p11.2	MDK*		0	0.645	-0.8	0.051	0.7	0.218
NM_016097	18q12	IER3IP1	immediate early response 3 interacting protein 1	0.1	0.513	-0.3	0.211	0.7	0.218
NM_004786	18q21.2	TXNL1	thioredoxin-like 1	0.1	0.493	-0.1	0.321	0.7	0.049
NM_017947	18q12	MOCOS	molybdenum cofactor sulfurase	-0.5	0.055	-0.6	0.071	0.7	0.194
NM_005151	18p11.32	USP14	ubiquitin specific peptidase 14 tRNA-guanine transglycosylase	-0.2	0.493	-0.1	0.321	0.7	0.089
NM_014302	7p11.2	SEC61G	Sec61 gamma subunit	0.2	0.438	0.2	0.287	0.7	0.176
NM_018570				0.4	0.211	0.5	0.063	0.7	0.15
AK000543	18q12.2	C18orf10	chromosome 18 open reading frame 10	0.1	0.466	0	0.515	0.7	0.194
NM_000104	2p21	CYP1B1	cytochrome P450 family 1 subfamily B polypeptide 1	-0.6	0.293	0	0.515	0.7	0.218
NM_004282	6p12.3-p11.2	BAG2	BCL2-associated athanogene 2	0.9	0.02	0.4	0.044	0.7	0.194
NM_006993	10q24.31	NPM3	nucleophosmin/nucleoplasmin 3	0.6	0.157	0.1	0.485	0.7	0.15
NM_005631	7q32.3	SMO	smoothened homolog Drosophila	0.8	0.018	0.3	0.16	0.7	0.089
NM_001831	8p21-p12	CLU	clusterin	0.1	0.534	0.9	0	0.7	0.049
NM_001075	4q13.2	UGT2B10	UDP glucuronosyltransferase 2 family polypeptide B10	0	0.589	0.2	0.211	0.7	0.194
AK001079	18q11.1	OSBPL1A	oxysterol binding protein-like 1A	0.5	0.022	0	0.394	0.7	0.194
NM_004864	19p13.1-13.2	GDF15	growth differentiation factor 15	-0.4	0.513	-0.5	0.16	0.7	0.194
M22538	18p11.31-11.2	NDUFV2	NADH dehydrogenase ubiquinone flavoprotein 2 24kDa	-0.1	0.573	-0.1	0.444	0.7	0.047
NM_002867	1p32-p31	RAB3B	RAB3B member RAS oncogene family	-0.3	0	0.1	0.09	0.8	0.194
AB037735	18p11.23	ARHGAP28	Rho GTPase activating protein 28					0.8	0.218
AK002107	1p32-p31	RAB3B	RAB3B member RAS oncogene family	-0.4	0.018	0.2	0.287	0.8	0.194
NM_005178	19q13.1-q13.2	BCL3	B-cell CLL/lymphoma 3	-0.4	0.046	-0.3	0.229	0.8	0.194
NM_005804	19p13.12	DDX39	DEAD Asp-Glu-Ala-Asp box polypeptide 39	1.4	0	0.3	0.253	0.8	0.194
AB042410	1p21.3	GPR88	G protein-coupled receptor 88	-2.4	0	-0.3	0.394	0.8	0.194
NM_003516	1q21.2	HIST2H2AA3	histone cluster 2 H2aa3	-0.1	0.645	1.2	0	0.8	0.194
NM_000985	18q21	RPL17	ribosomal protein L17	0.4	0.043	0.2	0.185	0.8	0
NM_000849	1p13.3	GSTM3	glutathione S-transferase M3 brain	0.6	0.086	0.9	0	0.9	0.176
NM_005909	5q13	MAP1B	microtubule-associated protein 1B	0.3	0.38	0.1	0.394	0.9	0.194
NM_001262	1p32	CDKN2C	cyclin-dependent kinase inhibitor 2C p18 inhibits CDK4	0.5	0.211	0.1	0.459	0.9	0.194
AF200348	2p25	PXDN	peroxidasin homolog Drosophila	-1.2	0.003	-1.3	0	0.9	0.064
AF190900	1q32.1	KLHL12	kelch-like 12 Drosophila	0.2	0.466	0.7	0	1	0.194
NM_016192	2q32.3	TMEFF2	transmembrane protein with EGF-like and two follistatin-like domains 2	0	0.645	0.3	0.115	1	0.049
NM_002795	17q12	PSMB3	proteasome prosome macropain subunit beta type 3	0.5	0.113	0.6	0.063	1	0
AL133572	12q24.31	FBXL10	F-box and leucine-rich repeat protein 10	0.5	0.086	0.9	0.005	1.1	0.049
NM_014214	18p11.2	IMPA2	inositol myo -1 or 4 -monophosphatase 2	0.3	0.242	0	0.515	1.1	0
AF086251	11q21	SESN3	sestrin 3	0.1	0.534	1.1	0.048	1.1	0.049
NM_005794	14q11.2	DHRS2	dehydrogenase/reductase SDR family member 2	1.4	0.003	1.5	0.071	1.2	0.051
Y09836	5q13	MAP1B	microtubule-associated protein 1B	0.7	0.046	1	0.011	1.2	0.101
NM_003712	19p13	PPAP2C	phosphatidic acid phosphatase type 2C	1.2	0	0.9	0.044	1.2	0
NM_003226	21q22.3	TFF3	trefoil factor 3 intestinal	1.9	0	-0.5	0.211	1.5	0.049
NM_001823	14q32	CKB	creatine kinase brain	1.7	0	1.5	0.015	1.6	0
AB037810	1q42.2	SIPA1L2	signal-induced proliferation-associated 1 like 2	0.9	0.046	1.5	0	1.7	0.049
NM_013452	Xp22	VCX	variable charge X-linked	2.3	0	1.6	0.015	1.7	0.049
NM_012463	12q24.31	ATP6V0A2	ATPase H transporting lysosomal V0 subunit a2	0.8	0.028	1.2	0.051	1.7	0
NM_004982	12p11.23	KCNJ8	potassium inwardly-rectifying channel subfamily J member 8	2.7	0	1.2	0	1.9	0
NM_014269	4q34	ADAM29	ADAM metallopeptidase domain 29	1.5	0	1.4	0.011	2.2	0
* no approved HUGO symbol / name exist for this entry. If present, gene symbol / name from the UNIGENE database are given in alternative.
2log_ratio>0 indicates over-expression in the therapy-resistant subline, compared to parental PC346C. 2log_ratio<0 indicates down-regulation in the therapy-resistant subline.
